# Supplementary material for: Mass spectrometric quantification of microRNAs in biological samples based on multistage signal amplification
Source: Royal Society of Chemistry journal article supplement (doi:10.1039/c9an02064k), 2019-12-30
Supplement: c9an02064k1.pdf [file c9an02064k1.pdf]

## **Supporting Information**

### **Mass spectrometric quantification of microRNA in biological samples based on multistage signal amplification**

Xiangtang Li,<sup>a</sup> Jingjin Zhao,<sup>\*ab</sup> Rui Xu,<sup>a</sup> Li Pan,<sup>a</sup> Yi-Ming Liu<sup>\*a</sup>

a. Department of Chemistry and Biochemistry, Jackson State University, 1400 Lynch St., Jackson, MS, 39217 (USA).

b. Department of Environmental Science and Resource, Guangxi Normal University, Guilin, 541004 (PR China)

## Experimental

### MCF-7 Cell Culture.

The MCF-7 cells were harvested from culture flasks during mid-logarithmic growth with trypsin/EDTA, washed, resuspended in DMEM and counted. Then transfer to thermo scientific™ nunc™ cell-culture treated multi-dishes. 50 µL cell suspension was delivered to each 1.0-mm well of multiple plates. Cell-culture treated multi-dishes were prepared to provide replicate sample wells for the control and drugs at each time point studied. The multi-dishes were kept in an incubator at 37°C in a water-vapor-saturated atmosphere containing 5% CO<sub>2</sub>. The cells were seeded and allowed to grow for 3-4 days to achieve logarithmic growth before addition of the drug tested. The medium was then replaced daily to ensure that nutrient depletion would not affect cell growth.

### Drug Treatment.

Toremifene 2-{p-[(Z)-4-chloro-1,2diphenyl-1-butenyl] phenoxy}-N, N-dimethylethylamine citrate (1:1) was dissolved in 70% ethanol and stored as “stock” solutions at -20°C until used. The final concentration of ethanol in drug-treated cultures was always less than 0.1%. The control cultures were fed with DMEM containing the same ethanol concentration as the drug-treated wells. To study changes of intro miR-21 level caused by drug stimulus, MCF-7 cells prepared as above were incubated with toremifene from 1µM to 10 µM in culture media for 6 h. The images of cells exposed to stimulus are shown in Figure S2. The cells were collected to measure miR-21. In order to decrease random error, cells collected from 4 wells via three steps of HE, CEA and AH, and then using HPLC-MS/MS to analysis.

## Supplementary Table and Figures

### Table S1

Table S1 Oligonucleotide sequences used in this work.

| Name         | Sequence (5' - 3')                             |
|--------------|------------------------------------------------|
| miRNA-21     | UAG CUU AUC AGA CUG AUG UUGA                   |
| SBM-21       | UAG CUU AUC AGA CUG AU <u>A</u> UUGA           |
| TBM-21       | UAG CUU AUC AGA CUG <u>CGG</u> UUGA            |
| Signal probe | Biotin -C3-TCAA CAT CAG TCT GAT AAG CTA CCCCCC |
| Test probe   | TCAA CAT CAG TCT GAT AAG CTA CCCCCC            |

**Figure S1**

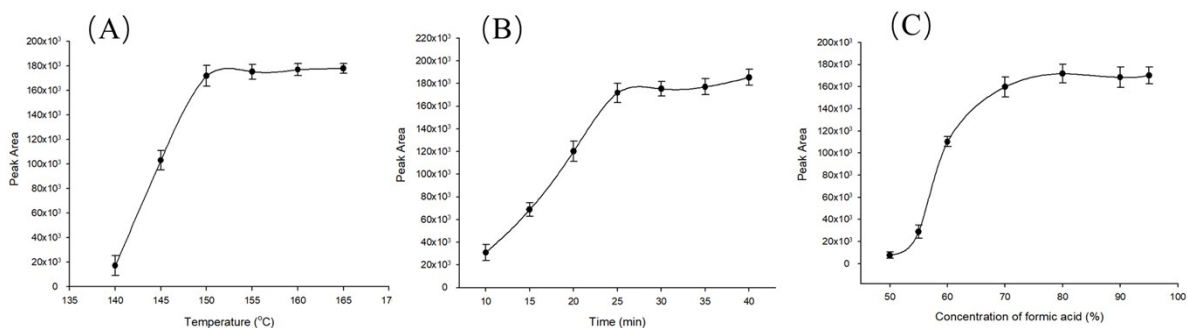

Fig. S1 Study of experimental conditions for acid hydrolysis: effects of temperature (A), hydrolysis time (B), and formic acid concentration (C).

**Figure S2**

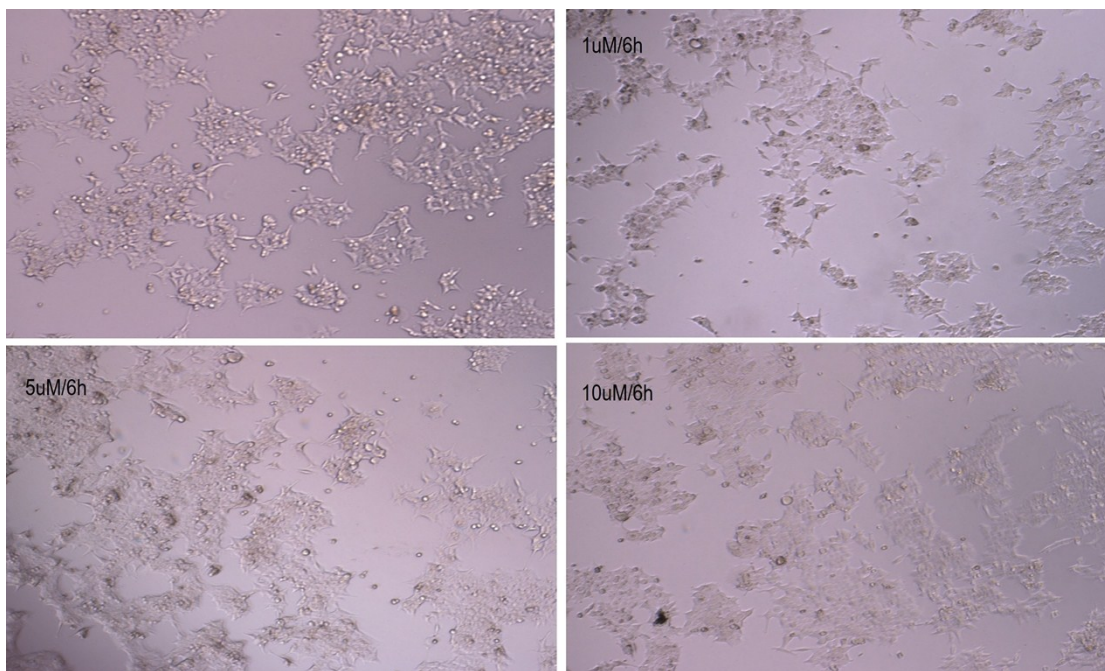

**Figure S2.** Microscopic images of MCF-7 cells after being cultured for 6 h in media. Concentrations of toremifene were 0, 1.0, 5.0, and 10.0  $\mu\text{M}$ , respectively.
